# Supplementary material for: Genomic epidemiology of SARS-CoV-2 reveals multiple lineages and early spread of SARS-CoV-2 infections in Lombardy, Italy
Source: PubMed Central journal article supplement (PMC7815831; doi:10.1038/s41467-020-20688-x), 2021-01-19
Supplement: 41467_2020_20688_MOESM1_ESM.pdf [file 41467_2020_20688_MOESM1_ESM.pdf]

1 **Supplementary Information**

2 **Title: Genomic epidemiology of SARS-CoV-2 reveals multiple lineages and early spread of**  
3 **SARS-CoV-2 infections in Lombardy, Italy**

4 **Running head:** Genomic epidemiology of SARS-CoV-2 in Lombardy, Italy

5 Claudia Alteri<sup>1§</sup>, Valeria Cento<sup>1§</sup>, Antonio Piralla<sup>2§</sup>, Valentino Costabile<sup>3</sup>, Monica Tallarita<sup>2</sup>, Luna  
6 Colagrossi<sup>4</sup>, Silvia Renica<sup>1</sup>, Federica Giardina<sup>2</sup>, Federica Novazzi<sup>2</sup>, Stefano Gaiarsa<sup>2</sup>, Elisa  
7 Matarazzo<sup>5</sup>, Maria Antonello<sup>1</sup>, Chiara Vismara<sup>6</sup>, Roberto Fumagalli<sup>7</sup>, Oscar Massimiliano Epis<sup>8</sup>,  
8 Massimo Puoti<sup>9</sup>, Carlo Federico Perno<sup>1,4✉</sup>, Fausto Baldanti<sup>2,10</sup>

9 <sup>1</sup>Department of Oncology and Hemato-oncology, University of Milan, Milan, Italy

10 <sup>2</sup>Molecular Virology Unit, Microbiology and Virology Department Fondazione IRCCS Policlinico  
11 San Matteo, Pavia, Italy

12 <sup>3</sup>Department of Pathophysiology and Transplantation, University of Milan, Milan, Italy

13 <sup>4</sup>Microbiology and Diagnostic Immunology, IRCCS, Bambino Gesù Children's Hospital, Rome, Italy

14 <sup>5</sup>Residency in Microbiology and Virology, University of Milan, Milan, Italy

15 <sup>6</sup>Chemico-clinical and Microbiological Analyses, ASST Grande Ospedale Metropolitano Niguarda,  
16 Milan, Italy

17 <sup>7</sup>Department of Anesthesiology, Critical Care and Pain Medicine, ASST Grande Ospedale  
18 Metropolitano Niguarda, 20162, Milan, Italy

19 <sup>8</sup>Rheumatology Unit, ASST Grande Ospedale Metropolitano Niguarda, 20162, Milan, Italy

20 <sup>9</sup>Infectious Diseases, ASST Grande Ospedale Metropolitano Niguarda, Milan, Italy

21 <sup>10</sup>Department of Clinical, Surgical, Diagnostic and Paediatric Sciences, University of Pavia, Pavia,  
22 Italy

23 <sup>§</sup> These authors contributed equally: CA, VCe, AP

24 ✉email: cf.perno@uniroma2.it

25

26

## 27 **Supplementary Results**

### 28 **Sampling criteria and patients' characteristics**

29 For 9,251 patients we were able to retrieve information regarding sex, age, and residence. In order  
30 to exclude sampling bias that could affect viral diversity, only one patient per family unit was  
31 selected (n=7,617). In order to have the measure of viral load of the selected samples, samples  
32 with Ct available were retrieved (n=1,561 samples). To warrant high quality sequences and good  
33 genomic coverage, samples with Ct values >35 cycles (n=418) were excluded. Out of the  
34 remaining 1,143 patients, 371 samples were selected for inclusion, according to the geographical  
35 distribution of COVID-19 cases. In Supplementary Table 1, the characteristics of the 9,251 Sars-  
36 CoV-2 infected patients with sex, age, and residence information available, were compared with  
37 the 371 selected samples. Likelihood Ratio Test, followed by a multinomial logistic regression  
38 model to estimate 95% confidence intervals of odds ratios, was used to compare demographic and  
39 clinical findings between general and selected SARS-CoV-2 infected populations. By looking at  
40 sex, age distribution, the selected population is well representative of SARS-CoV-2 infected  
41 general population at that time (at the time of writing the epidemiology is substantially different).  
42 Prevalence of chronic comorbidities is also similar, with the exception of a higher prevalence of  
43 cardiovascular and lung diseases in the selected population, compared to the general population  
44 (33.2% vs. 24.5%,  $P<0.001$  by Likelihood Ratio Test; and 14.2% vs. 11.3%,  $P=0.04$  by Likelihood  
45 Ratio Test, respectively). Disease severity and evidence of interstitial pneumonia were largely  
46 comparable, even though a lower prevalence of critical COVID-19 cases was observed in the  
47 selected population (4.3% vs. 9.6% in the general population;  $P=0.001$  by Likelihood Ratio Test).  
48 The most frequent symptom observed is fever in both populations (66.0% and 63.4%;  $P=0.290$  by  
49 Likelihood Ratio Test), followed by cough and dyspnea, whose prevalence were lower in the  
50 selected population (46.0% vs. 52.2% in general population,  $P=0.001$  by Likelihood Ratio Test; and  
51 38.8% vs. 50.1% in general population,  $P<0.001$  by Likelihood Ratio Test). The geographical  
52 distribution is also comparable between general and selected populations, with the exception of  
53 Milan, Pavia and Como. In this respect, it should be noted that this retrospective observational  
54 study involved two major hospitals localized in Milan and Pavia. Consequently, most of the SARS-

55 CoV-2 infected population resided in these two provinces (Milan: 31.1%; Pavia: 25.8%). In order to  
56 balance the geographical distribution in relation to population density and general prevalence of  
57 COVID-19 cases, patients from Milan and Pavia were under-sampled down to 20.6% and 19.2% of  
58 the selected population, respectively. A higher prevalence of patients residing in Como remained in  
59 the selected population in relation to the general population (19.2% vs. 8.7%,  $P < 0.001$  by  
60 Likelihood Ratio Test).

61 Overall, the study population was well representative of the whole Lombardy region, with the  
62 exception of the eastern part and northern valleys (i.e. Brescia, Mantua, Valtellina and  
63 Valcamonica, Figure 1).

## 64 **Supplementary Methods**

### 65 **Phylogenetic analysis**

#### 66 *Homoplasies checking*

67 To account for regions which might potentially be the result of hypervariability or sequencing  
68 artifacts, alignment positions showing significant homoplasy were identified by a combined  
69 approach. Homoplasies were firstly identified using HomoplasyFinder, and then confirmed by  
70 Treetime (homoplasy setting).<sup>1,2</sup> In detail, MPBoot was run on the alignment to reconstruct the  
71 Maximum Parsimony tree and to assess branch support following 1000 replicates ( $-bb 1000$ ). The  
72 resulting Maximum Parsimony treefile was used, together with the input alignment, to rapidly  
73 identify homoplasies using HomoplasyFinder.<sup>1</sup> To obtain a set of high confidence homoplasies, we  
74 then confirmed the results obtained by HomoplasyFinder using Treetime (homoplasy setting).<sup>2</sup> The  
75 top-10 significant homoplastic positions identified by TreeTime and confirmed in HomoplasyFinder  
76 were masked in the final alignment.

#### 77 *SARS-CoV-2 genome data set*

78 In order to represent the global diversity of the lineages by the end of April 2020 while minimizing  
79 the impact of sampling bias, 395 GISAID deposited sequences were added to the 346 consensus  
80 sequences obtained by our samples.

81 The 395 GISAID sequences were selected as follows. All available whole-genome SARS-CoV-2  
82 sequences (n=3244) on GISAID (gisaid.org) on 3 May 2020 were downloaded and submitted to  
83 the Pangolin application. Sequences from GISAID that were error-rich, and identical sequences  
84 from each country outbreak were removed. The exact date of virus collection was available for all  
85 sequences except for one genome from Lithuania for which only the month of viral collection  
86 (February, 2020) was available. In this case, the lack of tip date precision was accommodated by  
87 sampling uniformly across a 30-day window. Finally, the dataset was reduced to 395 sequences by  
88 only retaining the earliest, and the most recently sampled sequences from each country outbreak  
89 (range of dates: 2019, December 24 – 2020, April 4). Sequences were aligned using ClustalX and  
90 manually inspected in Bioedit. The final alignment was composed of 741 sequences 29,159  
91 nucleotides long.

#### 92 *Maximum likelihood tree and Bayesian interference*

93 In order to explore the phylogenetic structure of SARS-CoV-2, we used both the maximum  
94 likelihood (ML) and Bayesian coalescent methods. The ML phylogeny was estimated with IqTree<sup>3</sup>  
95 using the best-fit model of nucleotide substitution GTR+I.<sup>4</sup> Tree topology was assessed with the  
96 fast bootstrapping function with 1000 replicates. The ML tree was inspected in TempEst,<sup>5</sup> in order  
97 to define the correlation between genetic diversity (root-to-tip divergence) and time of sample  
98 collection (Supplementary Fig. 3). In order to obtain a corresponding time-scaled maximum clade  
99 credibility tree, a Bayesian coalescent tree analysis was undertaken with BEAST v1.10.5,<sup>6</sup> using  
100 the GTR+I substitution model with an exponential population growth tree prior and strict molecular  
101 clock, under a noninformative continuous-time Markov chain (CTMC) reference prior.<sup>7</sup> Taxon sets  
102 were defined and used to estimate the posterior probability of monophyly and the posterior  
103 distribution of the tMRCA of observed phylogenetic clusters. Four independent chains were run for  
104 50 million states and parameters and trees were sampled every 1,000 states. Upon completion,  
105 chains were combined using LogCombiner after removing 10% of states as burn-in and  
106 convergence was assessed with Tracer (ESS>100). Monophyly and tMRCA (time to the most  
107 recent common ancestor) statistics were calculated for each taxon set from the posterior tree  
108 distribution.

109 The information regarding location and recent travel history of the most informative sequences for  
110 virus spread and clustering identified in the first Bayesian tree were incorporated in a second  
111 Bayesian tree inference,<sup>8</sup> in order to yield more robust reconstructions of virus spread. For  
112 genomes from patients with a recent travel history, the travel locations in the ancestral location  
113 reconstructions were used. A GTR+I substitution model with an exponential population growth tree  
114 prior and strict molecular clock, under a noninformative continuous-time Markov chain (CTMC)  
115 reference prior<sup>7</sup> was used. Two independent chains were run for 25 million states and parameters  
116 and trees were sampled every 1,000 states. Upon completion, chains were combined using  
117 LogCombiner after removing 10% of states as burn-in and convergence was assessed with Tracer  
118 (ESS>100).

119 The maximum clade credibility (MCC) trees were inferred from the Bayesian posterior tree  
120 distribution using TreeAnnotator and visualized with FigTree 1.4.4.<sup>9</sup>

**Supplementary Table 1.** Demographic, and clinical findings of general SARS-CoV-2 infected population and the 371 originally selected SARS-CoV-2 infected patients.

|                                                         | General COVID-19 affected population, N=9,251 | Sampled population for SARS-CoV-2 sequencing, N=371 | Odds Ratio (Confidence Interval) <sup>§</sup> | P-value <sup>§</sup> |
|---------------------------------------------------------|-----------------------------------------------|-----------------------------------------------------|-----------------------------------------------|----------------------|
| Demographics and clinical characteristics               |                                               |                                                     |                                               |                      |
| Age, years                                              | 72 (55-83)                                    | 72 (54-84)                                          | 0.99 (0.99-1.00)                              | 0.736                |
| 18-39                                                   | 684 (7.4)                                     | 34 (9.2)                                            | 1.15 (0.76-1.73)                              | 0.173                |
| 40-49                                                   | 906 (9.8)                                     | 37 (10.0)                                           | 1.03 (0.71-1.51)                              | 0.878                |
| 50-59                                                   | 1355 (14.6)                                   | 53 (14.4)                                           | 0.92 (0.65-1.29)                              | 0.875                |
| 60-69                                                   | 1344 (14.5)                                   | 48 (13.0)                                           | 0.89 (0.63-1.25)                              | 0.398                |
| 70-79                                                   | 1788 (19.3)                                   | 66 (17.9)                                           | 0.93 (0.68-1.26)                              | 0.474                |
| ≥80                                                     | 3174 (34.3)                                   | 131 (35.5)                                          | 1.04 (0.83-1.31)                              | 0.623                |
| Sex, Male                                               | 4923 (53.2)                                   | 207 (56.1)                                          | 1.13 (0.91-1.39)                              | 0.258                |
| Residency                                               |                                               |                                                     |                                               |                      |
| <i>Milan</i>                                            | 2867 (31.1)                                   | 76 (20.6)                                           | 0.51 (0.30-0.88)                              | <0.001               |
| <i>Como</i>                                             | 803 (8.7)                                     | 71 (19.2)                                           | 2.65 (2.03-3.47)                              | <0.001               |
| <i>Pavia</i>                                            | 2390 (25.8)                                   | 71 (19.2)                                           | 0.50 (0.29-0.87)                              | <0.001               |
| <i>Bergamo</i>                                          | 790 (8.5)                                     | 37 (10.0)                                           | 1.20 (0.85-1.70)                              | 0.297                |
| <i>Lecco</i>                                            | 946 (10.2)                                    | 32 (8.7)                                            | 0.63 (0.34-1.16)                              | 0.315                |
| <i>Lodi</i>                                             | 589 (6.4)                                     | 34 (9.2)                                            | 1.14 (0.62-2.08)                              | 0.669                |
| <i>Cremona</i>                                          | 520 (5.6)                                     | 29 (7.9)                                            | 1.01 (0.54-1.90)                              | 0.115                |
| <i>Other<sup>a</sup></i>                                | 346 (3.7)                                     | 19 (5.1)                                            | 1.35 (0.82-2.23)                              | 0.231                |
| Chronic comorbidities <sup>b</sup>                      | 285 (51.3)                                    | 162 (51.3)                                          | 1.00 (0.71-1.40)                              | 0.918                |
| <i>Hypertension</i>                                     | 186 (33.5)                                    | 114 (36.1)                                          | 1.13 (0.92-1.88)                              | 0.133                |
| <i>Obesity</i>                                          | 41 (7.4)                                      | 25 (7.9)                                            | 1.17 (0.60-2.26)                              | 0.725                |
| <i>Diabetes</i>                                         | 52 (9.4)                                      | 33 (10.4)                                           | 1.34 (0.74-2.44)                              | 0.273                |
| <i>Cardiovascular disease</i>                           | 136 (24.5)                                    | 105 (33.2)                                          | 3.40 (2.16-5.34)                              | <0.001               |
| <i>Chronic obstructive lung disease</i>                 | 63 (11.3)                                     | 45 (14.2)                                           | 2.05 (1.15-3.64)                              | 0.040                |
| <i>Malignancies</i>                                     | 57 (10.3)                                     | 35 (11.1)                                           | 1.31 (0.74-2.29)                              | 0.558                |
| <i>Chronic kidney disease</i>                           | 40 (7.2)                                      | 24 (7.6)                                            | 1.12 (0.58-2.20)                              | 0.623                |
| <i>Chronic liver disease</i>                            | 13 (2.3)                                      | 4 (1.3)                                             | 0.33 (0.10-1.08)                              | 0.061                |
| <i>Other<sup>c</sup></i>                                | 37 (6.7)                                      | 28 (8.9)                                            | 2.5 (1.18-5.51)                               | 0.017                |
| Symptoms at admission <sup>d</sup>                      |                                               |                                                     |                                               |                      |
| <i>Fever</i>                                            | 479 (63.4)                                    | 165 (66.0)                                          | 1.19 (0.86-1.63)                              | 0.290                |
| <i>Cough</i>                                            | 410 (54.2)                                    | 115 (46.0)                                          | 0.59 (0.44-0.81)                              | 0.001                |
| <i>Dyspnea</i>                                          | 379 (50.1)                                    | 97 (38.8)                                           | 0.52 (0.38-0.72)                              | <0.001               |
| Time from symptoms-onset to SARS-CoV-2 diagnosis, weeks | 0.48 (0.26-0.78)                              | 0.29 (0.14-0.57)                                    | 0.09 (0.05-0.16)                              | <0.001               |
| Disease severity <sup>e</sup>                           |                                               |                                                     |                                               |                      |
| <i>Mild</i>                                             | 352 (46.3)                                    | 129 (50.8)                                          | 1.31 (0.97-1.77)                              | 0.080                |
| <i>Moderate</i>                                         | 163 (21.4)                                    | 57 (22.4)                                           | 1.09 (0.75-1.58)                              | 0.636                |
| <i>Severe</i>                                           | 172 (22.6)                                    | 57 (22.4)                                           | 0.98 (0.69-1.41)                              | 0.929                |
| <i>Critical</i>                                         | 73 (9.6)                                      | 11 (4.3)                                            | 0.32 (0.16-0.63)                              | 0.001                |
| Evidence of Interstitial Pneumonia <sup>f</sup>         | 410 (53.9)                                    | 126 (49.6)                                          | 0.77 (0.57-1.04)                              | 0.089                |
| SARS-CoV-2 rtPCR                                        |                                               |                                                     |                                               |                      |
| Mean cycle thresholds <sup>g</sup>                      | 23.9 (19.6-29.3)                              | 18.9 (16.9-20.1)                                    | 0.69 (0.66-0.72)                              | <0.001               |

Data are expressed as median (IQR), or N (%). <sup>§</sup>For comparisons of demographic and clinical findings between general and selected SARS-CoV-2 infected populations, a Likelihood Ratio Test followed by a multinomial logistic regression model to estimate 95% confidence intervals of odds ratios was used. Two-sided P-values are reported. <sup>ª</sup>Other includes Brescia, Mantua, Monza and Brianza, Sondrio and Varese. <sup>º</sup>Data available for 556 patients. <sup>¸</sup>Including: Crohn's disease (n=1), Hashimoto's thyroiditis (n=5), familial lipid disorders (n=10), rheumatoid arthritis (n=3), Amyotrophic Lateral Sclerosis (n=1), Parkinson's disease (n=1), cognitive disorders (n=10), immunological disorders (n=5), Tuberculosis (n=1). <sup>¸</sup>Data available for 756 patients. <sup>¸</sup>Data available for 760 patients. <sup>¸</sup>Diagnosed by X Ray or CT Scan. Data available for 5,578 patients. <sup>¸</sup>Real-time reverse transcription PCR Ct (cycle threshold) values of these samples ranged from 9 to 35 (GeneFinder™ COVID-19 Plus RealAmp Kit, ELITech; Allplex™ 2019-nCoV Assay, Seegene; Corman VM, Landt O, Kaiser M, et al. Detection of 2019 novel coronavirus (2019-nCoV) by real-time RT-PCR. Euro Surveill. 2020;25(3):2000045. doi:10.2807/1560-7917.ES.2020.25.3.2000045; <https://www.who.int/docs/default-source/coronaviruse/protocol-v2-1.pdf>).

**From February 22 through April 4, 2020**

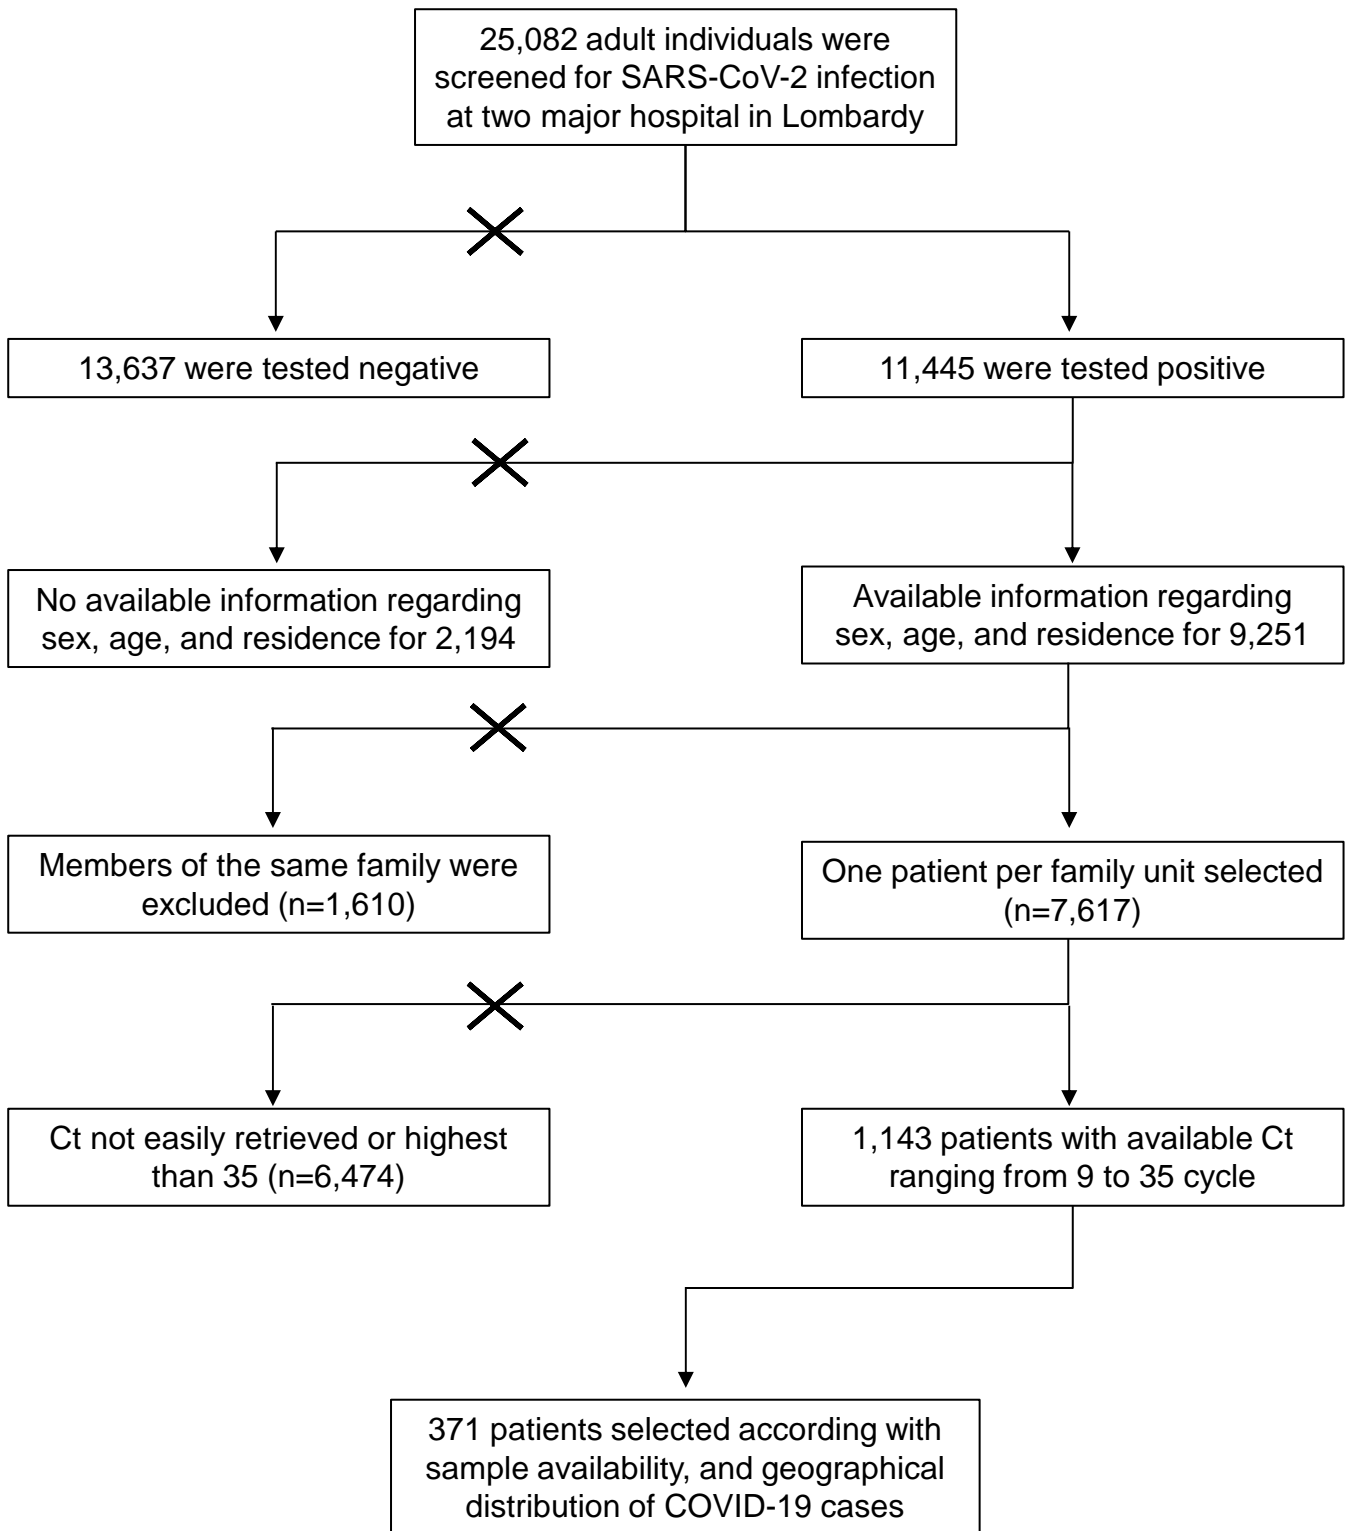

Supplementary Fig. 1. **Selection criteria for the 371 swab samples originally included in the study**



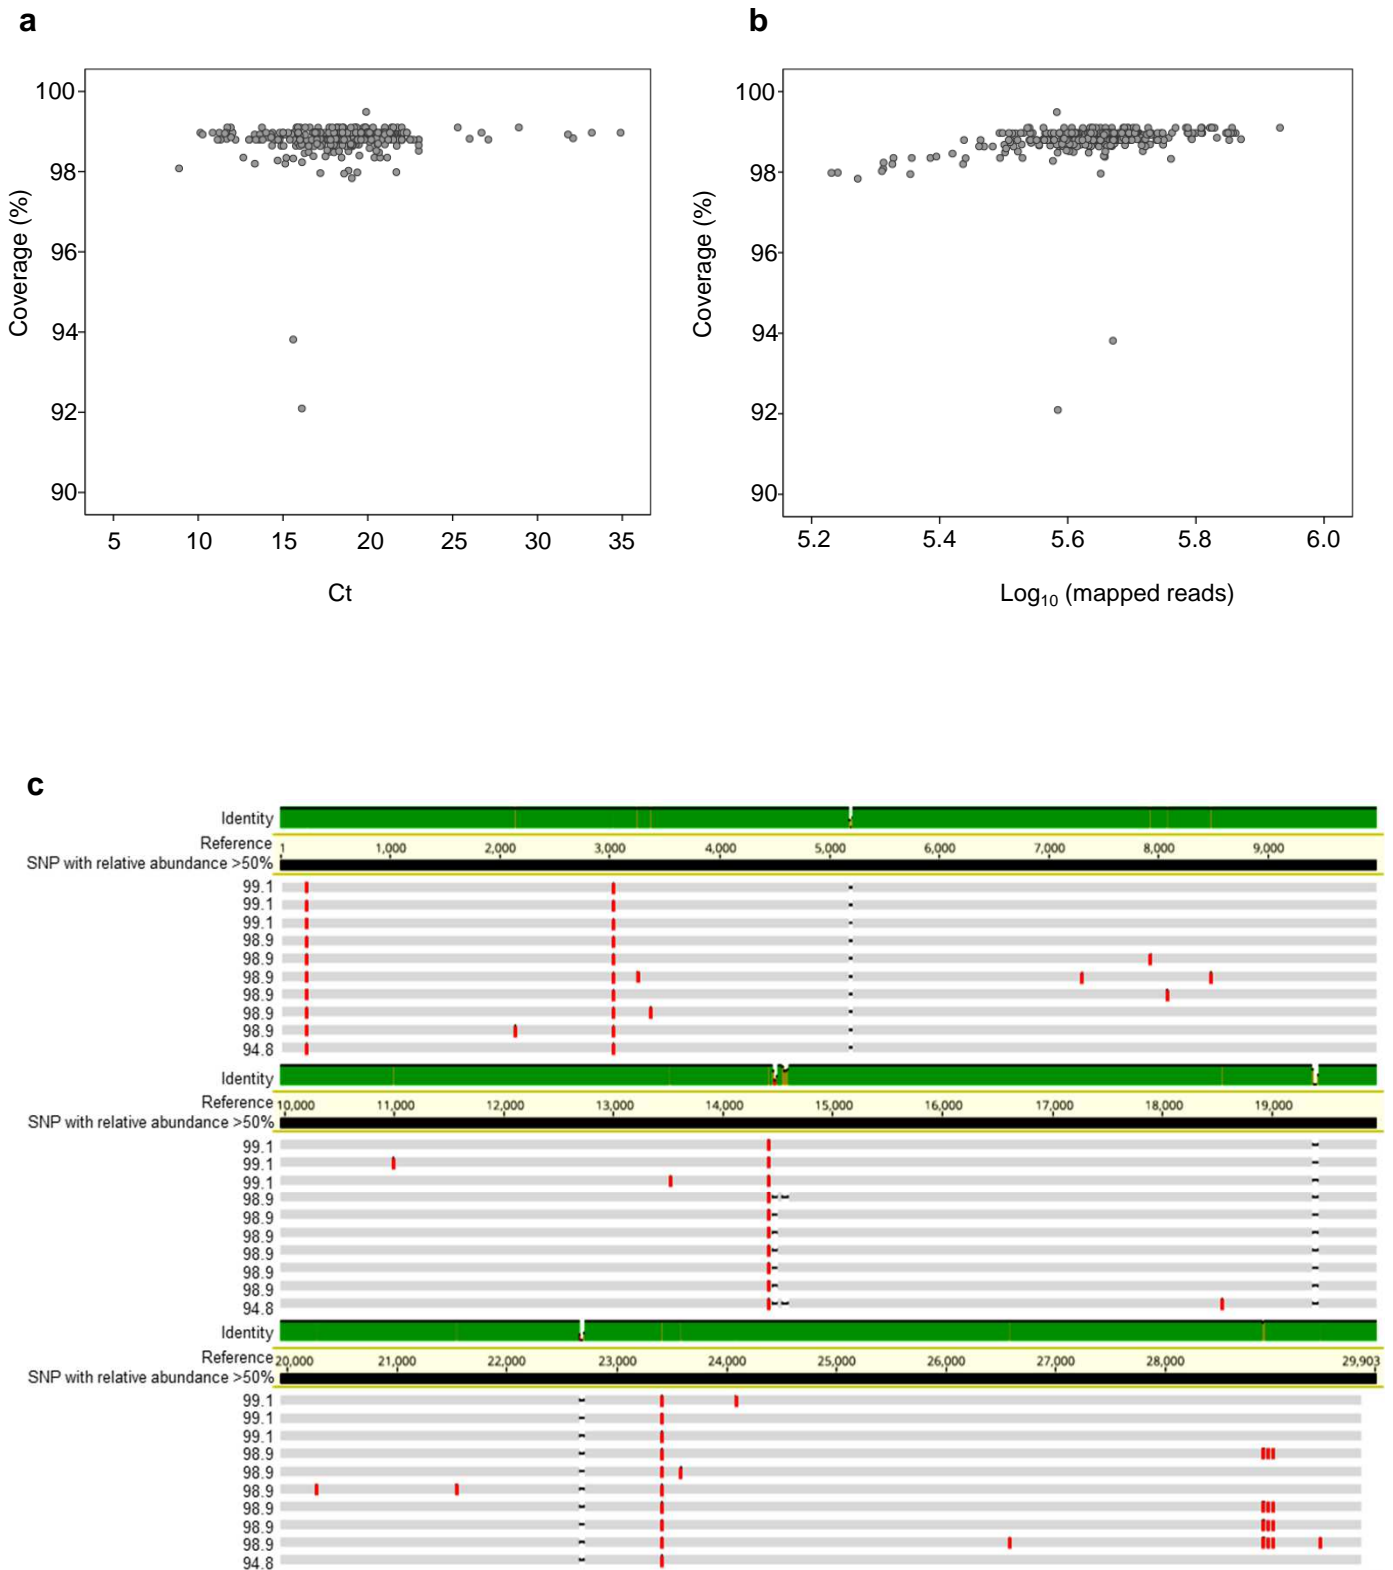

Supplementary Fig. 2. **Profile of SARS-CoV-2 Genome Sequences from Lombardy, Italy.** Plots of SARS-CoV-2 genome coverage against **a** rtPCR Ct Value and **b** the Number of Mapped Reads for the 355 samples described. Each sequence is represented by a dot. **c** Genome coverage map of the 10 SARS-CoV-2 samples representative of the genome coverage obtained. Single nucleotide polymorphisms (with respect to the reference genome NC\_045512.2) are in red, and uncovered portions are indicated by black gaps.  
 rtPCR: real-time polymerase chain reaction; Ct: cycle threshold; SNP: single nucleotide polymorphism

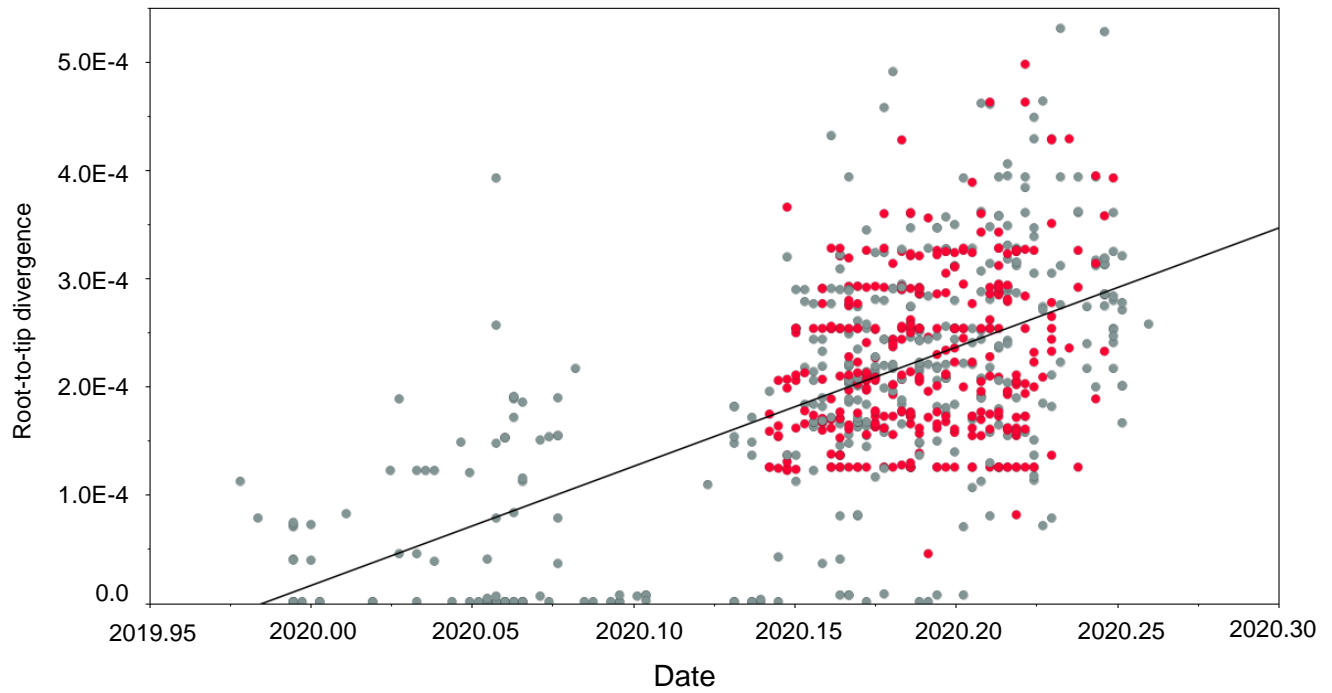

Supplementary Fig. 3. **Root-to-Tip Genetic Distance for SARS-CoV-2 Sequences in the Maximum Likelihood Tree Plotted against collection date.** The Pearson correlation coefficient between root-to-tip distance and collection date is 0.585. Sequences are colored by sampling location (Lombardy= red, other location = gray).

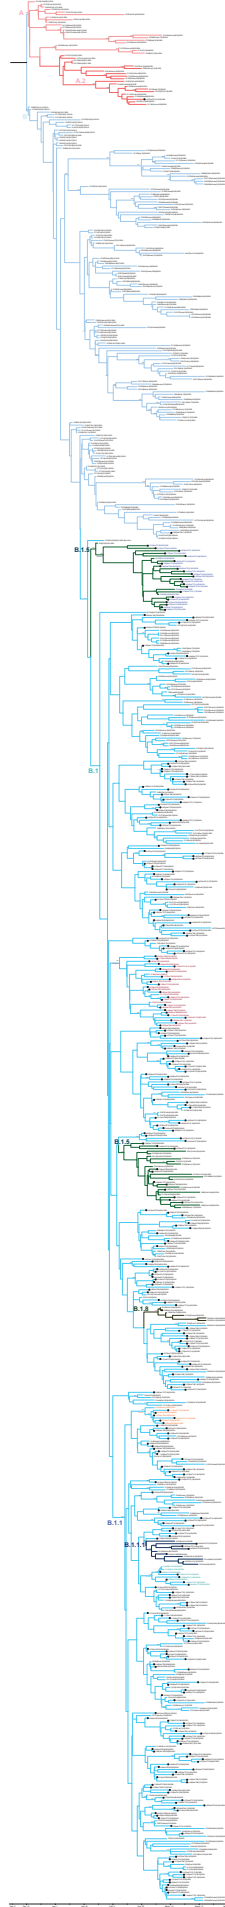

Supplementary Fig. 4. **Maximum clade credibility tree of SARS-CoV-2 genomes from Lombardy (taxa with red dots) and genomes from China and other countries (taxa without dots), according with lineages.** Lineages A and A.2 were defined by light and dark pink branches, B by light cyan branches, B.1 by light blue branches, B.1.1 by blue branches, B.1.5 and B.1.8 by light and dark green branches, B.1.1.1 by dark blue branches. Posterior probabilities  $>0.50$  were shown at the corresponding nodes. Tips of sequences involved in local clusters supported by a posterior probability  $\geq 0.98$  were highlighted in red (A), in blue (B), in cyan (C), and in orange (D). GISAID sequences come from Italy (n=15), East Europe (n=15), North Europe (n=10), South America (n=13), Africa (n=8), Japan (n=10), Oceania (n=25), West Asia (n=17), South Asia (n=14), Central Europe (n=30), East Asia (n=46), The Netherlands (n=41), South East Asia (n=19), North America (n=52), British Countries (n=47), China (n=55). Four independent chains were run for 50 million states.

## Supplementary References

1. Crispell, J., Balaz, D. & Gordon, S.V. HomoplasyFinder: a simple tool to identify homoplasies on a phylogeny. *Microb. Genom.* **5**, e000245 (2019).
2. Isabel, S., *et al.* Evolutionary and structural analyses of SARS-CoV-2 D614G spike protein mutation now documented worldwide. *Sci. Rep.* **10**,14031 (2020).
3. Nguyen, L.T, Schmidt, H.A., von Haeseler, A., & Minh, B.Q. IQ-TREE: A fast and effective stochastic algorithm for estimating maximum likelihood phylogenies. *Mol. Biol. Evol.* **32**, 268-274 (2015).
4. Tavaré S. Some Probabilistic and Statistical Problems in the Analysis of DNA Sequences. *Lectures Math. Life Sci.* **17**, 57–86 (1986).
5. Rambaut, A., Lam, T. T., Max Carvalho, L. & Pybus, O. G. Exploring the temporal structure of heterochronous sequences using TempEst (formerly Path-O-Gen). *Virus evolution* **2**, vew007, (2016).
6. Suchard, M. A. *et al.* Bayesian phylogenetic and phylodynamic data integration using BEAST 1.10. *Virus evolution* **4**, vey016 (2018).
7. Ferreira, M.A.& Suchard, M.A. Bayesian analysis of elapsed times in continuous-time Markov chains. *Can. J. Stat.* **36**, 355–368 (2008).
8. Lemey, P., *et al.* Accommodating individual travel history, global mobility, and unsampled diversity in phylogeography: a SARS-CoV-2 case study. Preprint at <https://www.biorxiv.org/content/10.1101/2020.06.22.165464v1> (2020).
9. Available at <http://tree.bio.ed.ac.uk/software/figtree/>.
